# Supplementary material for: Different Dietary Ratios of Camelina Oil to Sandeel Oil Influence the Capacity to Synthesise and Deposit EPA and DHA in Zucker Fa/Fa Rats
Source: MDPI journal article supplement (doi:10.3390/nu15102344), 2023-05-17
Supplement: s1 [file s1]

## Supplementary

**Table S1.** Sequence, GenBank number and reference for primers used in qPCR analysis of rat liver.

| Gene          | Sequence (5'-3')                                | Genbank no   | Reference                   |
|---------------|-------------------------------------------------|--------------|-----------------------------|
| <i>Fads1</i>  | GTTTGTGTGGGTGACGCAGAT<br>TTGAAGGCTGACTGGTGAACG  | NM_053445    | Zhou et al., 2008           |
| <i>Fads2</i>  | CGGGAGAAGATGCTACGGATG<br>GCCCTGAAGTCCTCGGTGAT   | NM_031344    | Zhou et al., 2008           |
| <i>Elovl5</i> | CTCACCTGCTGTCTCTCTA<br>ATCTGGTGGTTGTTCTTACG     | NM_134382.1  | Rodriguez-Cruz et al., 2011 |
| <i>Eif3a</i>  | CAGACTCCTGAGAGTGTTCTCTT<br>ACCCAGGGAGTCAGTAGCAA | NM_001047087 |                             |

**Table S2.** Biometric factors. Data are mean shown with standard deviation (BMI = body mass index, BW = body weight, Wat epi = epididymal visceral adipose tissue).

|                   | Ctrl  |        | CA    |        | CA25+SA75 |        | CA50+SA50 |        | CA75+SA25 |        | SA    |        |
|-------------------|-------|--------|-------|--------|-----------|--------|-----------|--------|-----------|--------|-------|--------|
| Weight, start (g) | 434.3 | ± 15.8 | 425.0 | ± 15.7 | 421.0     | ± 11.1 | 425.3     | ± 18.5 | 420.8     | ± 24.1 | 427.7 | ± 6.4  |
| Weight, final (g) | 534.3 | ± 28.1 | 511.8 | ± 28.6 | 512.5     | ± 17.6 | 509.4     | ± 18.8 | 524.5     | ± 30.5 | 525.0 | ± 26.6 |
| BMI               | 0.9   | ± 0.0  | 0.9   | ± 0.0  | 0.9       | ± 0.0  | 0.9       | ± 0.0  | 0.9       | ± 0.0  | 0.9   | ± 0.0  |
| Liver/kg BW       | 55.1  | ± 4.5  | 54.0  | ± 5.4  | 54.3      | ± 2.9  | 62.1      | ± 11.9 | 55.2      | ± 4.3  | 58.6  | ± 7.9  |
| Wat epi/kg BW     | 17.0  | ± 2.8  | 16.7  | ± 1.8  | 17.3      | ± 2.3  | 16.8      | ± 2.5  | 18.3      | ± 0.6  | 15.4  | ± 1.7  |

**Table S3.** Analyses of serum and plasma. Ctrl = control, CA = Camelina, SA = Sandeel. Data are means shown with standard deviation (n = 5-6). CRP = C-reactive protein, HDL = high-density lipoprotein, NEFA = non-esterified fatty acids, ALAT = alanine transaminase, ASAT = aspartate transaminase

|                          | Ctrl        | CA          | CA75+SA25   | CA50+SA50   | CA25+SA75   | SA          |
|--------------------------|-------------|-------------|-------------|-------------|-------------|-------------|
| CRP (mg/ml)              | 0.33 ± 0.09 | 0.33 ± 0.05 | 0.32 ± 0.15 | 0.39 ± 0.11 | 0.37 ± 0.06 | 0.41 ± 0.08 |
| Cholesterol (mmol/L)     | 8.3 ± 2.4   | 8.0 ± 2.7   | 7.5 ± 0.7   | 7.3 ± 1.1   | 8.3 ± 3.3   | 7.0 ± 0.7   |
| HDL-cholesterol (mmol/L) | 1.6 ± 1.9   | 1.7 ± 1.0   | 2.3 ± 1.5   | 2.3 ± 1.8   | 2.1 ± 1.4   | 2.4 ± 2.5   |
| Triacylglycerol (mmol/L) | 28.7 ± 17.3 | 28.0 ± 21.6 | 21.3 ± 9.6  | 18.3 ± 13.2 | 21.0 ± 15.8 | 17.7 ± 12.3 |
| NEFA (mmol/L)            | 0.55 ± 0.24 | 0.58 ± 0.25 | 0.56 ± 0.10 | 0.48 ± 0.15 | 0.40 ± 0.24 | 0.36 ± 0.03 |
| Bile acids (umol/L)      | 43 ± 22     | 32 ± 9      | 51 ± 29     | 40 ± 20     | 38 ± 19     | 35 ± 16     |
| ALAT (U/L)               | 91 ± 24     | 82 ± 32     | 91 ± 16     | 96 ± 28     | 81 ± 19     | 89 ± 30     |
| ASAT (U/L)               | 93 ± 49     | 84 ± 28     | 85 ± 20     | 104 ± 25    | 90 ± 19     | 103 ± 51    |

**Table S4:** Fatty acid composition ( % of total fatty acids) in blood cells. Data are means (n=6) shown with standard deviation. Different letters indicate significant differences (p<0.05) evaluated using one-way ANOVA followed by Tukey's HSD. Ctrl = Control, CA = Camelina oil, SA = Sandeel oil.

|                  | Ctrl          | CA            | CA75+SA25      | CA50+SA50      | CA25+SA75     | SA             |
|------------------|---------------|---------------|----------------|----------------|---------------|----------------|
| 14:0             | 0.63 ± 0.2    | 0.56 ± 0.1    | 0.70 ± 0.2     | 0.61 ± 0.3     | 0.82 ± 0.2    | 0.76 ± 0.3     |
| 16:0             | 25.91 ± 2.3   | 25.90 ± 2.1   | 25.63 ± 0.9    | 25.52 ± 1.4    | 26.00 ± 0.9   | 26.44 ± 1.4    |
| 18:0             | 11.73 ± 2.4   | 12.02 ± 2.4   | 11.97 ± 1.4    | 12.24 ± 2.6    | 10.84 ± 1.8   | 11.46 ± 1.9    |
| 24:0             | 0.50 ± 0.2    | 0.47 ± 0.1    | 0.49 ± 0.1     | 0.59 ± 0.2     | 0.46 ± 0.1    | 0.53 ± 0.2     |
| <b>ΣSFA</b>      | 39.26 ± 1.2   | 39.43 ± 1.5   | 39.30 ± 0.8    | 39.54 ± 1.4    | 38.63 ± 1.8   | 39.72 ± 1.4    |
| 16:1n-7          | 3.01 ± 1.0    | 2.61 ± 0.6    | 2.68 ± 0.6     | 2.56 ± 1.5     | 3.36 ± 0.5    | 3.21 ± 1.3     |
| 18:1n-9          | 16.75 ± 4.4   | 16.16 ± 5.0   | 15.07 ± 1.9    | 13.34 ± 5.0    | 15.82 ± 3.2   | 14.28 ± 3.6    |
| 18:1n-7          | 2.93 ± 0.3 a  | 2.48 ± 0.3 ab | 2.35 ± 0.1 b   | 2.42 ± 0.3 b   | 2.47 ± 0.1 ab | 2.49 ± 0.2 ab  |
| 20:1n-9          | 0.26 ± 0.1 b  | 0.91 ± 0.3 a  | 0.90 ± 0.2 a   | 0.78 ± 0.3 a   | 0.85 ± 0.1 a  | 0.69 ± 0.2 a   |
| 24:1n-9          | 0.30 ± 0.1 b  | 0.51 ± 0.1 ab | 0.52 ± 0.1 ab  | 0.67 ± 0.3 a   | 0.49 ± 0.1 ab | 0.58 ± 0.2 ab  |
| <b>ΣMUFA</b>     | 23.70 ± 5.6   | 23.09 ± 6.0   | 21.94 ± 2.7    | 20.14 ± 6.8    | 23.40 ± 3.8   | 21.62 ± 5.1    |
| 18:2n-6          | 12.30 ± 2.2 a | 9.55 ± 0.9 b  | 9.56 ± 0.9 b   | 9.09 ± 1.5 b   | 9.64 ± 0.2 b  | 8.58 ± 0.9 b   |
| 20:3n-6          | 0.73 ± 0.1 c  | 0.78 ± 0.1 bc | 0.83 ± 0.1 abc | 0.78 ± 0.1 bc  | 1.00 ± 0.1 a  | 0.97 ± 0.0 ab  |
| 20:4n-6          | 15.53 ± 5.6   | 15.13 ± 4.8   | 15.28 ± 3.4    | 16.50 ± 6.1    | 12.27 ± 2.1   | 13.83 ± 5.0    |
| 22:4n-6          | 1.03 ± 0.2 a  | 0.63 ± 0.1 b  | 0.55 ± 0.1 b   | 0.57 ± 0.2 b   | 0.44 ± 0.1 b  | 0.47 ± 0.1 b   |
| 22:5n-6          | 0.75 ± 0.1 a  | 0.31 ± 0.1 b  | 0.29 ± 0.0 b   | 0.28 ± 0.1 b   | 0.24 ± 0.0 b  | 0.27 ± 0.1 b   |
| <b>Σn-6 PUFA</b> | 30.75 ± 3.9   | 26.86 ± 4.3   | 26.93 ± 2.5    | 27.53 ± 4.8    | 23.92 ± 2.2   | 24.37 ± 4.3    |
| 18:3n-3          | 0.70 ± 0.2 c  | 2.21 ± 0.7 a  | 2.01 ± 0.7 ab  | 1.38 ± 0.8 abc | 1.13 ± 0.3 bc | 0.44 ± 0.2 c   |
| 20:5n-3          | 0.17 ± 0.0 d  | 0.71 ± 0.2 cd | 1.17 ± 0.2 bc  | 1.60 ± 0.2 b   | 2.51 ± 0.5 a  | 2.70 ± 0.5 a   |
| 22:5n-3          | 0.84 ± 0.2 b  | 1.75 ± 0.4 a  | 1.80 ± 0.1 a   | 1.94 ± 0.2 a   | 2.10 ± 0.2 a  | 2.17 ± 0.2 a   |
| 22:6n-3          | 1.99 ± 0.4 c  | 3.05 ± 0.7 b  | 3.85 ± 0.3 b   | 4.12 ± 0.5 b   | 5.33 ± 0.9 a  | 5.53 ± 0.4 a   |
| <b>Σn-3 PUFA</b> | 3.70 ± 0.5 d  | 7.86 ± 1.1 c  | 8.99 ± 1.0 c   | 9.11 ± 1.1 bc  | 11.28 ± 1.0 a | 11.00 ± 1.2 ab |

**Table S5.** Fatty acid composition (% of total fatty acids) and fat content (%) in liver. Data are means shown with standard deviation (n=6). Different letters indicate significant differences (p<0.05) evaluated using one-way ANOVA followed by Tukey's HSD. CA = Camelina, SA = Sandeel.

|                  | Ctrl         | CA            | CA75+SA25     | CA50+SA50     | CA25+SA75    | SA            |
|------------------|--------------|---------------|---------------|---------------|--------------|---------------|
| <b>Fat %</b>     | 13.5 ± 6.8   | 11.2 ± 4.0    | 11.8 ± 4.6    | 15.2 ± 6.1    | 12.2 ± 1.1   | 14.3 ± 6.1    |
| <b>14:0</b>      | 1.2 ± 0.2    | 1.1 ± 0.1     | 1.2 ± 0.2     | 1.1 ± 0.2     | 1.3 ± 0.2    | 1.3 ± 0.1     |
| <b>16:0</b>      | 31.7 ± 1.4   | 31.4 ± 1.0    | 31.9 ± 1.4    | 31.5 ± 1.8    | 30.2 ± 4.6   | 31.4 ± 1.4    |
| <b>18:0</b>      | 7.7 ± 2.3    | 8.4 ± 1.5     | 8.4 ± 2.3     | 6.4 ± 2.3     | 6.5 ± 1.4    | 6.3 ± 1.2     |
| <b>ΣSFA</b>      | 41.0 ± 1.4   | 41.3 ± 0.9    | 41.9 ± 1.2    | 39.4 ± 1.8    | 38.4 ± 6.0   | 39.5 ± 1.0    |
| <b>14:1 n-5</b>  | 0.3 ± 0.1    | 0.2 ± 0.1     | 0.3 ± 0.1     | 0.3 ± 0.1     | 0.3 ± 0.0    | 0.3 ± 0.1     |
| <b>16:1 n-9</b>  | 0.6 ± 0.1    | 0.5 ± 0.0     | 0.4 ± 0.3     | 0.6 ± 0.1     | 0.5 ± 0.1    | 0.5 ± 0.1     |
| <b>16:1 n-7</b>  | 6.1 ± 1.5    | 5.2 ± 0.5     | 5.6 ± 1.2     | 5.9 ± 0.9     | 6.2 ± 1.2    | 6.6 ± 0.7     |
| <b>18:1 n-9</b>  | 25.2 ± 4.4   | 24.4 ± 4.4    | 24.6 ± 4.7    | 27.6 ± 6.4    | 23.9 ± 4.0   | 25.6 ± 5.6    |
| <b>18:1 n-7</b>  | 3.4 ± 0.5 a  | 2.8 ± 0.3 ab  | 2.7 ± 0.3 b   | 2.9 ± 0.2 ab  | 2.6 ± 0.5 b  | 2.9 ± 0.1 ab  |
| <b>20:1 n-9</b>  | 0.1 ± 0.0 b  | 0.4 ± 0.0 a   | 0.3 ± 0.1 a   | 0.3 ± 0.1 a   | 0.3 ± 0.1 a  | 0.4 ± 0.1 a   |
| <b>ΣMUFA</b>     | 36.0 ± 6.3   | 33.8 ± 4.6    | 34.1 ± 6.1    | 37.9 ± 6.9    | 34.3 ± 5.5   | 37.0 ± 5.8    |
| <b>18:2 n-6</b>  | 8.8 ± 0.8 a  | 7.8 ± 0.5 ab  | 7.2 ± 0.4 ab  | 7.3 ± 0.9 ab  | 6.3 ± 1.4 b  | 7.3 ± 1.2 ab  |
| <b>20:3 n-6</b>  | 0.5 ± 0.2    | 0.6 ± 0.1     | 0.7 ± 0.2     | 0.5 ± 0.3     | 0.6 ± 0.2    | 0.7 ± 0.3     |
| <b>20:4 n-6</b>  | 7.0 ± 2.6    | 6.9 ± 1.9     | 6.4 ± 2.3     | 4.6 ± 2.3     | 4.1 ± 1.5    | 3.9 ± 1.1     |
| <b>22:4 n-6</b>  | 0.4 ± 0.2 a  | 0.2 ± 0.0 b   | 0.1 ± 0.0 bc  | 0.1 ± 0.1 bc  | 0.0 ± 0.0 c  | 0.1 ± 0.1 bc  |
| <b>Σn-6 PUFA</b> | 17.3 ± 3.5 a | 15.9 ± 2.4 ab | 14.8 ± 2.9 ab | 12.8 ± 3.2 ab | 11.4 ± 3.1 b | 12.3 ± 2.5 ab |
| <b>18:3 n-3</b>  | 0.4 ± 0.1 e  | 1.8 ± 0.2 a   | 1.4 ± 0.2 ab  | 1.1 ± 0.3 bc  | 0.8 ± 0.2 cd | 0.5 ± 0.1 de  |
| <b>20:5 n-3</b>  | 0.1 ± 0.0 c  | 0.4 ± 0.1 bc  | 0.6 ± 0.2 bc  | 0.7 ± 0.3 b   | 0.9 ± 0.2 b  | 1.5 ± 0.6 a   |
| <b>22:5 n-3</b>  | 0.3 ± 0.1 c  | 0.9 ± 0.2 bc  | 0.9 ± 0.2 b   | 0.9 ± 0.3 bc  | 0.9 ± 0.3 b  | 1.5 ± 0.5 a   |
| <b>22:6 n-3</b>  | 2.2 ± 0.9 b  | 3.4 ± 0.9 ab  | 3.9 ± 1.2 ab  | 3.5 ± 1.5 ab  | 4.1 ± 1.4 ab | 5.5 ± 1.8 a   |
| <b>Σn-3 PUFA</b> | 3.1 ± 1.1 b  | 6.7 ± 1.3 ab  | 6.9 ± 1.7 a   | 6.3 ± 2.4 ab  | 6.8 ± 1.9 a  | 9.1 ± 3.1 a   |
| <b>EPA+DHA</b>   | 2.3 ± 0.9 b  | 3.9 ± 1.1 b   | 4.5 ± 1.3 ab  | 4.2 ± 1.8 ab  | 5.0 ± 1.5 ab | 6.9 ± 2.4 a   |
| <b>n-6/n-3</b>   | 5.9 ± 1.3 a  | 2.4 ± 0.2 b   | 2.2 ± 0.2 b   | 2.1 ± 0.4 b   | 1.7 ± 0.1 b  | 1.5 ± 0.5 b   |

**Table S6.** Fatty acid composition (% of total fatty acids) and fat content (%) in heart. Data are means shown with standard deviation (n=6). Different letters indicate significant differences (p<0.05) evaluated using one-way ANOVA followed by Tukey's HSD. CA = Camelina, SA = Sandeel.

|                  | Ctrl         | CA            | CA75+SA25     | CA50+SA50     | CA25+SA75     | SA           |
|------------------|--------------|---------------|---------------|---------------|---------------|--------------|
| <b>Fat %</b>     | 4.2 ± 0.2    | 3.9 ± 0.8     | 4.6 ± 0.9     | 4.1 ± 1.0     | 4.8 ± 1.2     | 4.02 ± 0.4   |
| <b>14:0</b>      | 0.3 ± 0.1    | 0.3 ± 0.1     | 0.6 ± 0.2     | 0.4 ± 0.4     | 0.6 ± 0.3     | 0.5 ± 0.1    |
| <b>16:0</b>      | 15.6 ± 0.8   | 15.8 ± 1.5    | 17.9 ± 2.3    | 16.5 ± 2.7    | 17.8 ± 2.0    | 16.8 ± 0.5   |
| <b>18:0</b>      | 17.4 ± 0.9   | 16.9 ± 1.3    | 15.2 ± 2.2    | 15.7 ± 2.3    | 14.7 ± 2.0    | 15.8 ± 0.8   |
| <b>ΣSFA</b>      | 33.5 ± 0.2   | 33.2 ± 0.7    | 33.9 ± 0.5    | 32.9 ± 1.0    | 33.3 ± 0.4    | 33.4 ± 0.7   |
| <b>16:1 n-7</b>  | 1.3 ± 0.3    | 1.4 ± 0.7     | 2.5 ± 1.1     | 1.9 ± 1.3     | 2.5 ± 1.2     | 1.8 ± 0.4    |
| <b>18:1 n-9</b>  | 8.7 ± 1.3    | 9.2 ± 2.2     | 11.4 ± 3.3    | 9.8 ± 3.4     | 10.9 ± 3.4    | 9.1 ± 1.4    |
| <b>18:1 n-7</b>  | 4.0 ± 0.2 a  | 3.7 ± 0.2 b   | 3.7 ± 0.1 b   | 3.6 ± 0.1 b   | 3.5 ± 0.1 b   | 3.7 ± 0.1 b  |
| <b>20:1 n-9</b>  | 0.1 ± 0.0 c  | 0.6 ± 0.0 a   | 0.6 ± 0.0 a   | 0.6 ± 0.1 ab  | 0.5 ± 0.1 ab  | 0.5 ± 0.1 b  |
| <b>22:1 n-11</b> | 0.0 ± 0.0 c  | 0.0 ± 0.0 c   | 0.0 ± 0.0 c   | 0.2 ± 0.2 bc  | 0.5 ± 0.1 ab  | 0.7 ± 0.4 a  |
| <b>ΣMUFA</b>     | 14.2 ± 1.5   | 15.0 ± 2.8    | 18.5 ± 4.7    | 16.4 ± 5.1    | 18.3 ± 4.9    | 16.1 ± 1.8   |
| <b>18:2 n-6</b>  | 12.9 ± 0.8   | 12.3 ± 0.5    | 12.6 ± 0.5    | 12.9 ± 1.0    | 12.6 ± 1.1    | 12.0 ± 0.3   |
| <b>20:2 n-6</b>  | 0.2 ± 0.1 b  | 0.4 ± 0.1 a   | 0.3 ± 0.0 ab  | 0.3 ± 0.0 ab  | 0.2 ± 0.0 b   | 0.0 ± 0.1 c  |
| <b>20:3 n-6</b>  | 0.7 ± 0.1    | 0.8 ± 0.1     | 0.7 ± 0.1     | 0.7 ± 0.2     | 0.7 ± 0.1     | 0.8 ± 0.1    |
| <b>20:4 n-6</b>  | 18.7 ± 1.0 a | 16.3 ± 1.7 ab | 13.8 ± 2.3 bc | 14.3 ± 2.4 bc | 12.1 ± 1.8 c  | 13.2 ± 0.7 c |
| <b>22:4 n-6</b>  | 1.8 ± 0.2 a  | 0.7 ± 0.1 b   | 0.5 ± 0.1 c   | 0.4 ± 0.1 cd  | 0.3 ± 0.0 cd  | 0.2 ± 0.1 d  |
| <b>22:5 n-6</b>  | 2.7 ± 0.4 a  | 0.7 ± 0.1 b   | 0.4 ± 0.1 bc  | 0.4 ± 0.0 bc  | 0.3 ± 0.0 c   | 0.2 ± 0.1 c  |
| <b>Σn-6 PUFA</b> | 37.1 ± 0.8 a | 31.1 ± 1.9 b  | 28.2 ± 2.2 bc | 28.9 ± 2.7 bc | 26.2 ± 2.0 c  | 26.5 ± 0.8 c |
| <b>18:3 n-3</b>  | 0.4 ± 0.1 de | 1.2 ± 0.2 ab  | 1.4 ± 0.3 a   | 0.9 ± 0.3 bc  | 0.7 ± 0.2 cd  | 0.4 ± 0.1 e  |
| <b>20:5 n-3</b>  | 0.1 ± 0.0 d  | 0.2 ± 0.0 cd  | 0.4 ± 0.1 bc  | 0.5 ± 0.1 b   | 0.8 ± 0.1 a   | 0.9 ± 0.2 a  |
| <b>22:5 n-3</b>  | 2.7 ± 0.2 c  | 4.8 ± 0.4 a   | 3.6 ± 0.5 b   | 3.7 ± 0.7 b   | 3.5 ± 0.6 bc  | 3.6 ± 0.4 b  |
| <b>22:6 n-3</b>  | 7.9 ± 1.1 c  | 10.4 ± 1.0 bc | 10.6 ± 2.0 bc | 12.6 ± 2.4 ab | 13.5 ± 2.5 ab | 15.2 ± 1.4 a |
| <b>Σn-3 PUFA</b> | 11.1 ± 0.9 c | 16.7 ± 1.0 ab | 15.9 ± 2.2 b  | 17.7 ± 2.8 ab | 18.5 ± 2.8 ab | 20.1 ± 1.9 a |
| <b>EPA+DHA</b>   | 8.0 ± 1.0 c  | 10.6 ± 1.0 bc | 11.0 ± 2.1 bc | 13.1 ± 2.4 ab | 14.3 ± 2.5 a  | 16.2 ± 1.6 a |
| <b>n-6/n-3</b>   | 3.4 ± 0.2 a  | 1.9 ± 0.1 b   | 1.8 ± 0.2 b   | 1.7 ± 0.2 bc  | 1.4 ± 0.1 c   | 1.3 ± 0.2 c  |
